# Supplementary material for: Influence of surface coating on the microstructures and dielectric properties of BaTiO3 ceramic via a cold sintering process
Source: Royal Society of Chemistry journal article supplement (doi:10.1039/d0ra03849k), 2020-01-01
Supplement: d0ra03849k1.pdf [file d0ra03849k1.pdf]

## Supporting information

### Influence of surface coating on the microstructures and dielectric properties of BaTiO<sub>3</sub> ceramic via cold sintering process

S. L. Kang<sup>ac</sup>, H. X. Guo<sup>a\*</sup>, J. B. Wang<sup>c</sup>, X. L. Zhong<sup>c</sup>, B. Li<sup>bd\*</sup>

<sup>a</sup> State Key Laboratory of Intense Pulsed Radiation Simulation and Effect (Northwest Institute of Nuclear Technology), Xi'an, 710024, China

<sup>b</sup> Science and Technology on Reliability Physics and Application Technology of Electronic Component Laboratory, 510610, China

<sup>c</sup> School of Materials and Engineering, Xiangtan University, Hunan Xiangtan 411105, China

<sup>d</sup> Department of Materials Science and Engineering, Southern University of Science and Technology, Shenzhen, 518055, China

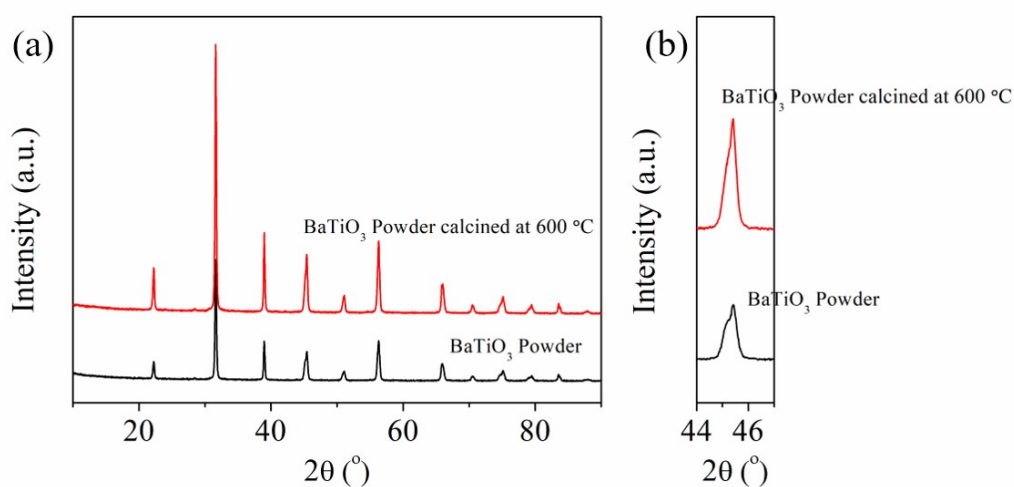

Fig. S1. (a), (b) XRD patterns of the BaTiO<sub>3</sub> powders and the BaTiO<sub>3</sub> powders calcined at 600 °C.

\* Author to whom correspondence should be addressed; electronic mail: [bli@xtu.edu.cn](mailto:bli@xtu.edu.cn), [guohxnint@126.com](mailto:guohxnint@126.com)

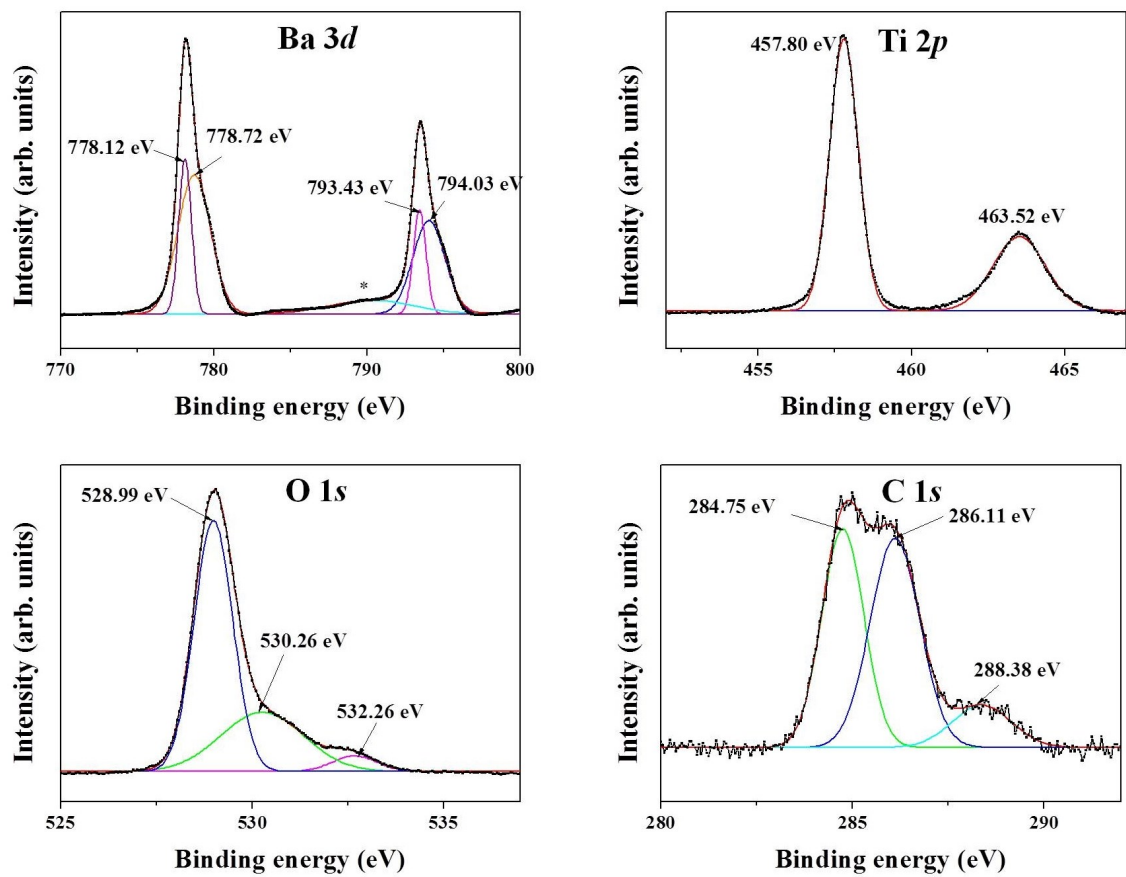

Fig. S2. The Ba 3d, Ti 2p, O 1s and C 1s photoelectron spectra of the BaTiO<sub>3</sub> powders calcined at 600 °C.

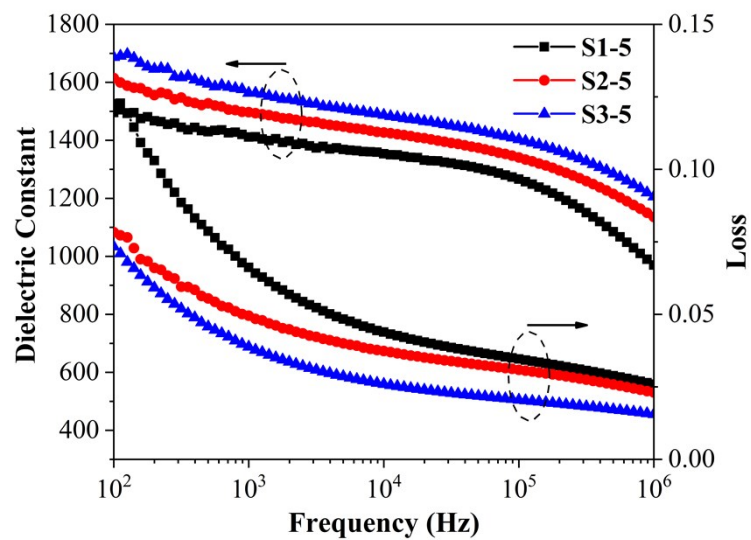

Fig. S3. Comparison of frequency dependence of dielectric properties of S1-5, S2-5 and S3-5.
